# Supplementary material
Source: ML conference proceedings conference paper supplement (https://proceedings.neurips.cc/paper_files/paper/2023/hash/2a25d9d873e9ae6d242c62e36f89ee3a-Abstract.html)
Supplement: Supplementary file 1 [file 2a25d9d873e9ae6d242c62e36f89ee3a-Supplemental-Conference.zip]

Archive with 2 entries (2 files):
- appendix.pdf
- code.zip
